# Supplementary material
Source: PubMed Central journal article supplement (PMC5599158)
Supplement: NIHMS781246-supplement-supplement_1.pdf [file NIHMS781246-supplement-supplement_1.pdf]

## Appendix

**Supplement Table 1. Biomarkers advanced to multivariable modeling:**

| Domain | Biomarker                                                                                            | Categories                                                                                                                                                                       |
|--------|------------------------------------------------------------------------------------------------------|----------------------------------------------------------------------------------------------------------------------------------------------------------------------------------|
| CART   | Number of subregions with worsening in thickness across entire knee                                  | <ul style="list-style-type: none"> <li>• 0 areas with worsening</li> <li>• 1 area with worsening</li> <li>• 2 areas with worsening</li> <li>• 3+ areas with worsening</li> </ul> |
|        | Number of subregions with worsening in surface area (include within-grade change) across entire knee | <ul style="list-style-type: none"> <li>• 0 areas with worsening</li> <li>• 1 area with worsening</li> <li>• 2 areas with worsening</li> <li>• 3+ areas with worsening</li> </ul> |
| OST    | Osteophyte : maximum change in osteophyte score $\geq 1$ across all locations in knee                | <ul style="list-style-type: none"> <li>• No (no worsening in any subregion)</li> <li>• Yes (worsening in at least one subregion)</li> </ul>                                      |
| MEN    | Meniscal morphology: any regions with worsening                                                      | <ul style="list-style-type: none"> <li>• No (no worsening in any subregion)</li> <li>• Yes (worsening in at least one subregion)</li> </ul>                                      |
|        | Medial meniscal extrusion medially worsening                                                         | <ul style="list-style-type: none"> <li>• No (no worsening)</li> <li>• Yes (worsening)</li> </ul>                                                                                 |
| BML    | Maximum change in BML score                                                                          | <ul style="list-style-type: none"> <li>• Worsening by <math>&lt; 2</math> grades</li> </ul>                                                                                      |

|     |                                                 |                                                                                                           |
|-----|-------------------------------------------------|-----------------------------------------------------------------------------------------------------------|
|     | across all subregions in knee                   | <ul style="list-style-type: none"> <li>• Worsening by 2+ grades</li> </ul>                                |
| SYN | Synovitis: change in Hoffa-synovitis category   | <ul style="list-style-type: none"> <li>• Improvement/no change</li> <li>• Worsening</li> </ul>            |
| EFF | Effusion: change in synovitis-effusion category | <ul style="list-style-type: none"> <li>• Improvement</li> <li>• No change</li> <li>• Worsening</li> </ul> |
